# Supplementary material for: Artificial Intelligence and the Future of Communication Sciences and Disorders: A Bibliometric and Visualization Analysis
Source: Preprints.org preprint supplement (doi:10.20944/preprints202401.2235.v1), 2024-01-31
Supplement: Supplementary file 1 [file supplementary]

**Table S1. Keyword search in WoS.**

| **Step** | **Search query** | **Result** |
| --- | --- | --- |
| #1 | TS=(“artificial intelligen*” OR “machine intelligen*” OR “machine learning” OR “data learning” OR “neural network” OR “support vector*” OR “k-nearest neighbor*” OR “markov decision” OR “markov chain” OR “markov random field” OR “natural language process” OR “deep learn*” OR “big data” OR “fuzzy” OR “cluster*” OR “classifier” OR “classification algorithm” OR “automatic” OR “autonomous” OR “automated” OR “computational intelligence” OR “computer vision” OR “intelligent comput*” OR “robot*” OR “intelligent tutor*” OR “intelligent agent*” OR “intelligent system*” OR “expert system*” OR “voice recognition” OR “speech recognition”) | 3,791,294 |
| #2 | TS=(“speech* patholog*” OR “communication disorder*” OR “speech* disorder*” OR “language disorder*” OR “speech* impair*” OR “speech* therap*” OR “speech* assess*” OR “pathological speech” OR “pathological language” OR “stutter*” OR “dysarthria” OR “swallow* disorder*” OR “voic* disorder*” OR “aphasia” OR “speech apraxia” OR (“autis*” AND (“speech” OR “language”)) OR (“schizophreni*” AND (“speech” OR “language”)) OR (“brain injur*” AND (“speech” OR “language”)) OR (“dement*” AND (“speech” OR “language”))) | 84,644 |
| #3 | #2 AND #1 | 5,870 |
| #4 | #2 AND #1 and Letters or Meeting Abstracts or Corrections or Notes or Books or Book Chapters (Exclude – Document Types) | 5,810 |
| #5 | #2 AND #1 and Letters or Meeting Abstracts or Corrections or Notes or Books (Exclude – Document Types) and English (Languages) | 5,714 |
| #6 | AU=Anonymous | 1,453,335 |
| #7 | #5 NOT #6 | 5,711 |

**Table S2. Keyword search in Scopus.**

| **Step** | **Search query** | **Result** |
| --- | --- | --- |
| #1 | TITLE-ABS-KEY(“artificial intelligen*” OR “machine intelligen*” OR “machine learning” OR “data learning” OR “neural network” OR “support vector*” OR “k-nearest neighbor*” OR “markov decision” OR “markov chain” OR “markov random field” OR “natural language process” OR “deep learn*” OR “big data” OR “fuzzy” OR “cluster*” OR “classifier” OR “classification algorithm” OR “automatic” OR “autonomous” OR “automated” OR “computational intelligence” OR “computer vision” OR “intelligent comput*” OR “robot*” OR “intelligent tutor*” OR “intelligent agent*” OR “intelligent system*” OR “expert system*” OR “voice recognition” OR “speech recognition”) | 5,927,021 |
| #2 | TITLE-ABS-KEY(“speech* patholog*” OR “communication disorder*” OR “speech* disorder*” OR “language disorder*” OR “speech* impair*” OR “speech* therap*” OR “speech* assess*” OR “pathological speech” OR “pathological language” OR “stutter*” OR “dysarthria” OR “swallow* disorder*” OR “voic* disorder*” OR “aphasia” OR “speech apraxia” OR (“autis*” AND (“speech” OR “language”)) OR (“schizophreni*” AND (“speech” OR “language”)) OR (“brain injur*” AND (“speech” OR “language”)) OR (“dement*” AND (“speech” OR “language”))) | 173,745 |
| #3 | (TITLE-ABS-KEY(“artificial intelligen*” OR “machine intelligen*” OR “machine learning” OR “data learning” OR “neural network” OR “support vector*” OR “k-nearest neighbor*” OR “markov decision” OR “markov chain” OR “markov random field” OR “natural language process” OR “deep learn*” OR “big data” OR “fuzzy” OR “cluster*” OR “classifier” OR “classification algorithm” OR “automatic” OR “autonomous” OR “automated” OR “computational intelligence” OR “computer vision” OR “intelligent comput*” OR “robot*” OR “intelligent tutor*” OR “intelligent agent*” OR “intelligent system*” OR “expert system*” OR “voice recognition” OR “speech recognition”)) AND (TITLE-ABS-KEY(“speech* patholog*” OR “communication disorder*” OR “speech* disorder*” OR “language disorder*” OR “speech* impair*” OR “speech* therap*” OR “speech* assess*” OR “pathological speech” OR “pathological language” OR “stutter*” OR “dysarthria” OR “swallow* disorder*” OR “voic* disorder*” OR “aphasia” OR “speech apraxia” OR (“autis*” AND (“speech” OR “language”)) OR (“schizophreni*” AND (“speech” OR “language”)) OR (“brain injur*” AND (“speech” OR “language”)) OR (“dement*” AND (“speech” OR “language”)))) | 10,298 |
| #4 | (TITLE-ABS-KEY(“artificial intelligen*” OR “machine intelligen*” OR “machine learning” OR “data learning” OR “neural network” OR “support vector*” OR “k-nearest neighbor*” OR “markov decision” OR “markov chain” OR “markov random field” OR “natural language process” OR “deep learn*” OR “big data” OR “fuzzy” OR “cluster*” OR “classifier” OR “classification algorithm” OR “automatic” OR “autonomous” OR “automated” OR “computational intelligence” OR “computer vision” OR “intelligent comput*” OR “robot*” OR “intelligent tutor*” OR “intelligent agent*” OR “intelligent system*” OR “expert system*” OR “voice recognition” OR “speech recognition”)) AND (TITLE-ABS-KEY(“speech* patholog*” OR “communication disorder*” OR “speech* disorder*” OR “language disorder*” OR “speech* impair*” OR “speech* therap*” OR “speech* assess*” OR “pathological speech” OR “pathological language” OR “stutter*” OR “dysarthria” OR “swallow* disorder*” OR “voic* disorder*” OR “aphasia” OR “speech apraxia” OR (“autis*” AND (“speech” OR “language”)) OR (“schizophreni*” AND (“speech” OR “language”)) OR (“brain injur*” AND (“speech” OR “language”)) OR (“dement*” AND (“speech” OR “language”)))) AND (EXCLUDE(DOCTYPE, "cr") OR (EXCLUDE(DOCTYPE, "ch") OR EXCLUDE(DOCTYPE, "no") OR EXCLUDE(DOCTYPE, "le") OR EXCLUDE(DOCTYPE, "bk") OR EXCLUDE(DOCTYPE, "er") OR EXCLUDE(DOCTYPE, "tb")) | 9,694 |
| #5 | (TITLE-ABS-KEY(“artificial intelligen*” OR “machine intelligen*” OR “machine learning” OR “data learning” OR “neural network” OR “support vector*” OR “k-nearest neighbor*” OR “markov decision” OR “markov chain” OR “markov random field” OR “natural language process” OR “deep learn*” OR “big data” OR “fuzzy” OR “cluster*” OR “classifier” OR “classification algorithm” OR “automatic” OR “autonomous” OR “automated” OR “computational intelligence” OR “computer vision” OR “intelligent comput*” OR “robot*” OR “intelligent tutor*” OR “intelligent agent*” OR “intelligent system*” OR “expert system*” OR “voice recognition” OR “speech recognition”)) AND (TITLE-ABS-KEY(“speech* patholog*” OR “communication disorder*” OR “speech* disorder*” OR “language disorder*” OR “speech* impair*” OR “speech* therap*” OR “speech* assess*” OR “pathological speech” OR “pathological language” OR “stutter*” OR “dysarthria” OR “swallow* disorder*” OR “voic* disorder*” OR “aphasia” OR “speech apraxia” OR (“autis*” AND (“speech” OR “language”)) OR (“schizophreni*” AND (“speech” OR “language”)) OR (“brain injur*” AND (“speech” OR “language”)) OR (“dement*” AND (“speech” OR “language”)))) AND (EXCLUDE(DOCTYPE, "cr") OR (EXCLUDE(DOCTYPE, "ch") OR EXCLUDE(DOCTYPE, "no") OR EXCLUDE(DOCTYPE, "le") OR EXCLUDE(DOCTYPE, "bk") OR EXCLUDE(DOCTYPE, "er") OR EXCLUDE(DOCTYPE, "tb")) AND (LIMIT-TO(LANGUAGE, "English")) | 9,324 |
| #6 | (TITLE-ABS-KEY(“artificial intelligen*” OR “machine intelligen*” OR “machine learning” OR “data learning” OR “neural network” OR “support vector*” OR “k-nearest neighbor*” OR “markov decision” OR “markov chain” OR “markov random field” OR “natural language process” OR “deep learn*” OR “big data” OR “fuzzy” OR “cluster*” OR “classifier” OR “classification algorithm” OR “automatic” OR “autonomous” OR “automated” OR “computational intelligence” OR “computer vision” OR “intelligent comput*” OR “robot*” OR “intelligent tutor*” OR “intelligent agent*” OR “intelligent system*” OR “expert system*” OR “voice recognition” OR “speech recognition”)) AND (TITLE-ABS-KEY(“speech* patholog*” OR “communication disorder*” OR “speech* disorder*” OR “language disorder*” OR “speech* impair*” OR “speech* therap*” OR “speech* assess*” OR “pathological speech” OR “pathological language” OR “stutter*” OR “dysarthria” OR “swallow* disorder*” OR “voic* disorder*” OR “aphasia” OR “speech apraxia” OR (“autis*” AND (“speech” OR “language”)) OR (“schizophreni*” AND (“speech” OR “language”)) OR (“brain injur*” AND (“speech” OR “language”)) OR (“dement*” AND (“speech” OR “language”)))) AND (EXCLUDE(DOCTYPE, "cr") OR (EXCLUDE(DOCTYPE, "ch") OR EXCLUDE(DOCTYPE, "no") OR EXCLUDE(DOCTYPE, "le") OR EXCLUDE(DOCTYPE, "bk") OR EXCLUDE(DOCTYPE, "er") OR EXCLUDE(DOCTYPE, "tb")) AND (LIMIT-TO(LANGUAGE, "English")) AND (EXCLUDE(PREFNAMEAUID, "Undefined#Undefined")) | 9,324 |
